# Supplementary material for: Development of predictive models for silicone rubber–water partition coefficients of hydrophobic organic contaminants
Source: Royal Society of Chemistry journal article supplement (doi:10.1039/c9em00343f), 2019-01-01
Supplement: c9em00343f1.pdf [file c9em00343f1.pdf]

Table S1. Experimental  $\log K_{\text{srw}}$  values and  $\log K_{\text{ow}}$  values for 119 chemicals in training and validation sets

| ID | Cas no.    | Name                          | $\log K_{\text{ow}}$ | $\log K_{\text{srw}}$ |
|----|------------|-------------------------------|----------------------|-----------------------|
| 1  | 91-20-3    | Naphthalene                   | 3.35 <sup>1</sup>    | 3.28 <sup>1,2</sup>   |
| 2  | 208-96-8   | Acenaphthylene                | 3.61 <sup>1</sup>    | 3.33 <sup>1,2</sup>   |
| 3  | 83-32-9    | Acenaphthene                  | 3.92 <sup>1</sup>    | 3.73 <sup>1,2</sup>   |
| 4  | 86-73-7    | Fluorene                      | 4.18 <sup>1</sup>    | 3.84 <sup>1,2</sup>   |
| 5  | 91-57-6    | 2-Methylnaphthalene           | 4 <sup>1</sup>       | 4.06 <sup>1</sup>     |
| 6  | 90-12-0    | 1-Methylnaphthalene           | 3.87 <sup>1</sup>    | 4.00 <sup>1</sup>     |
| 7  | 85-01-8    | Phenanthrene                  | 4.52 <sup>1</sup>    | 4.07 <sup>1-3</sup>   |
| 8  | 120-12-7   | Anthracene                    | 4.5 <sup>1</sup>     | 4.19 <sup>1-3</sup>   |
| 9  | 2531-84-2  | 2-Methylphenanthrene          | 5.24 <sup>1</sup>    | 4.89 <sup>1</sup>     |
| 10 | 1576-67-6  | 3,6-Dimethylphenanthrene      | 5.25 <sup>1</sup>    | 5.15 <sup>1</sup>     |
| 11 | 66271-32-7 | 2,6,9-Trimethylphenanthrene   | 5.99 <sup>1</sup>    | 5.34 <sup>1</sup>     |
| 12 | 132-65-0   | Dibenzothiophene              | 4.38 <sup>1</sup>    | 4.04 <sup>1</sup>     |
| 13 | 206-44-0   | Fluoranthene                  | 5.2 <sup>1</sup>     | 4.50 <sup>1-3</sup>   |
| 14 | 129-00-0   | Pyrene                        | 5 <sup>1</sup>       | 4.54 <sup>1-3</sup>   |
| 15 | 25889-60-5 | 1-Methylfluoranthene          | 5.48 <sup>1</sup>    | 5.01 <sup>1</sup>     |
| 16 | 15679-24-0 | 2,7-Dimethylpyrene            | 6.03 <sup>1</sup>    | 6.30 <sup>1</sup>     |
| 17 | 195-19-7   | Benzo[ <i>c</i> ]phenanthrene | 5.76 <sup>1</sup>    | 5.38 <sup>1</sup>     |
| 18 | 56-55-3    | Benz[ <i>a</i> ]anthracene    | 5.91 <sup>1</sup>    | 5.26 <sup>1-3</sup>   |
| 19 | 218-01-9   | Chrysene                      | 5.86 <sup>1</sup>    | 5.14 <sup>1-3</sup>   |
| 20 | 3351-32-4  | 2-Methylchrysene              | 6.88 <sup>1</sup>    | 6.15 <sup>1</sup>     |
| 21 | 205-99-2   | Benzo[ <i>b</i> ]fluoranthene | 5.78 <sup>1</sup>    | 5.94 <sup>1,3</sup>   |
| 22 | 207-08-9   | Benzo[ <i>k</i> ]fluoranthene | 6.11 <sup>1</sup>    | 5.91 <sup>1,3</sup>   |
| 23 | 192-97-2   | Benzo[ <i>e</i> ]pyrene       | 6.44 <sup>1</sup>    | 5.78 <sup>1,3</sup>   |
| 24 | 50-32-8    | Benzo[ <i>a</i> ]pyrene       | 6.35 <sup>1</sup>    | 5.83 <sup>1-3</sup>   |
| 25 | 198-55-0   | Perylene                      | 6.25 <sup>1</sup>    | 6.02 <sup>1</sup>     |

|    |            |                                 |                   |                     |
|----|------------|---------------------------------|-------------------|---------------------|
| 26 | 63041-77-0 | 7-Methylbenzo[ <i>a</i> ]pyrene | 6.66 <sup>a</sup> | 6.97 <sup>1</sup>   |
| 27 | 193-39-5   | Indeno[ <i>1,2,3-cd</i> ]pyrene | 7.66 <sup>1</sup> | 6.55 <sup>1-3</sup> |
| 28 | 191-24-2   | Benzo[ <i>g,h,i</i> ]perylene   | 6.9 <sup>1</sup>  | 6.21 <sup>1-3</sup> |
| 29 | 53-70-3    | Dibenz[ <i>a,h</i> ]anthracene  | 6.75 <sup>1</sup> | 6.39 <sup>1-3</sup> |
| 30 | 7012-37-5  | PCB 28                          | 5.67 <sup>1</sup> | 5.2 <sup>1-3</sup>  |
| 31 | 16606-02-3 | PCB 31                          | 5.67 <sup>1</sup> | 5.08 <sup>1,2</sup> |
| 32 | 37680-69-6 | PCB 35                          | 5.82 <sup>1</sup> | 4.56 <sup>1</sup>   |
| 33 | 41464-39-5 | PCB 44                          | 5.75 <sup>1</sup> | 5.51 <sup>1,2</sup> |
| 34 | 41464-40-8 | PCB 49                          | 5.85 <sup>1</sup> | 5.55 <sup>1,2</sup> |
| 35 | 35693-99-3 | PCB 52                          | 5.84 <sup>1</sup> | 5.48 <sup>1-3</sup> |
| 36 | 41464-41-9 | PCB 53                          | 5.62 <sup>1</sup> | 5.02 <sup>1</sup>   |
| 37 | 32598-11-1 | PCB 70                          | 6.2 <sup>1</sup>  | 5.17 <sup>1</sup>   |
| 38 | 32690-93-0 | PCB 74                          | 6.2 <sup>1</sup>  | 5.29 <sup>1</sup>   |
| 39 | 41464-51-1 | PCB 97                          | 6.29 <sup>1</sup> | 5.85 <sup>1,2</sup> |
| 40 | 38380-01-7 | PCB 99                          | 6.39 <sup>1</sup> | 6.03 <sup>1,2</sup> |
| 41 | 37680-73-2 | PCB 101                         | 6.38 <sup>1</sup> | 6.08 <sup>1-3</sup> |
| 42 | 32598-14-4 | PCB 105                         | 6.65 <sup>1</sup> | 6.01 <sup>1,2</sup> |
| 43 | 38380-03-9 | PCB 110                         | 6.48 <sup>1</sup> | 6.02 <sup>1,2</sup> |
| 44 | 74472-36-9 | PCB 112                         | 6.45 <sup>1</sup> | 5.59 <sup>1</sup>   |
| 45 | 31508-00-6 | PCB 118                         | 6.74 <sup>1</sup> | 6.26 <sup>1-3</sup> |
| 46 | 38380-07-3 | PCB 128                         | 6.74 <sup>1</sup> | 6.43 <sup>1,2</sup> |
| 47 | 38380-05-1 | PCB 132                         | 6.58 <sup>1</sup> | 5.79 <sup>1</sup>   |
| 48 | 35694-06-5 | PCB 137                         | 6.83 <sup>1</sup> | 6.46 <sup>1,2</sup> |
| 49 | 35065-28-2 | PCB 138                         | 7.88 <sup>3</sup> | 6.68 <sup>1-3</sup> |
| 50 | 38380-04-0 | PCB 149                         | 6.67 <sup>1</sup> | 6.40 <sup>1,2</sup> |
| 51 | 52663-63-5 | PCB 151                         | 6.64 <sup>1</sup> | 6.33 <sup>1,2</sup> |
| 52 | 35065-27-1 | PCB 153                         | 7.84 <sup>3</sup> | 6.57 <sup>1-3</sup> |
| 53 | 38380-08-4 | PCB 156                         | 7.85 <sup>3</sup> | 6.85 <sup>1-3</sup> |

|    |            |                          |                   |                     |
|----|------------|--------------------------|-------------------|---------------------|
| 54 | 69782-90-7 | PCB 157                  | 7.18 <sup>1</sup> | 6.06 <sup>1</sup>   |
| 55 | 74472-42-7 | PCB 158                  | 7.02 <sup>1</sup> | 6.20 <sup>1</sup>   |
| 56 | 35065-30-6 | PCB 170                  | 8.62 <sup>3</sup> | 6.96 <sup>1-3</sup> |
| 57 | 35065-29-3 | PCB 180                  | 8.58 <sup>3</sup> | 6.92 <sup>1-3</sup> |
| 58 | 52663-69-1 | PCB 183                  | 7.2 <sup>1</sup>  | 6.67 <sup>1</sup>   |
| 59 | 52663-68-0 | PCB 187                  | 8.53 <sup>3</sup> | 6.89 <sup>1-3</sup> |
| 60 | 39635-31-9 | PCB 189                  | 7.24 <sup>1</sup> | 6.45 <sup>1</sup>   |
| 61 | 2051-24-3  | PCB 209                  | 8.18 <sup>1</sup> | 7.81 <sup>1</sup>   |
| 62 | 87-68-3    | Hexachloro-1,3-butadiene | 5.43 <sup>3</sup> | 4.68 <sup>3</sup>   |
| 63 | 118-74-1   | Hexachlorobenzene        | 6.2 <sup>3</sup>  | 4.99 <sup>2,3</sup> |
| 64 | 37680-65-2 | PCB-18                   | 5.89 <sup>3</sup> | 5.15 <sup>2,3</sup> |
| 65 | 41464-42-0 | PCB-72                   | 6.42 <sup>3</sup> | 5.82 <sup>3</sup>   |
| 66 | 60145-21-3 | PCB-103                  | 7.16 <sup>3</sup> | 6.15 <sup>3</sup>   |
| 67 | 32598-10-0 | PCB-66                   | 6.46 <sup>3</sup> | 5.88 <sup>2,3</sup> |
| 68 | 33979-03-2 | PCB-155                  | 7.85 <sup>3</sup> | 6.84 <sup>2,3</sup> |
| 69 | 32598-13-3 | PCB-77                   | 6.44 <sup>3</sup> | 5.64 <sup>3</sup>   |
| 70 | 57465-28-8 | PCB-126                  | 7.1 <sup>3</sup>  | 5.98 <sup>3</sup>   |
| 71 | 32774-16-6 | PCB-169                  | 7.77 <sup>3</sup> | 6.57 <sup>3</sup>   |
| 72 | 81-14-1    | Musk ketone              | 4.3 <sup>4</sup>  | 3.05 <sup>4</sup>   |
| 73 | 81-15-2    | Musk xylene              | 4.8 <sup>4</sup>  | 3.31 <sup>4</sup>   |
| 74 | 145-39-1   | Musk tibetene            | 5.9 <sup>4</sup>  | 4.15 <sup>4</sup>   |
| 75 | 83-66-9    | Musk ambrette            | 5.7 <sup>4</sup>  | 3.91 <sup>4</sup>   |
| 76 | 1222-05-5  | Galaxolide               | 5.9 <sup>4</sup>  | 3.97 <sup>4</sup>   |
| 77 | 1506-02-1  | Tonalide                 | 5.7 <sup>4</sup>  | 4.01 <sup>4</sup>   |
| 78 | 13171-00-1 | Celestolide              | 5.9 <sup>4</sup>  | 3.96 <sup>4</sup>   |
| 79 | 68140-48-7 | Traseolide               | 6.3 <sup>4</sup>  | 4.36 <sup>4</sup>   |
| 80 | 15323-35-0 | Phantolide               | 5.9 <sup>4</sup>  | 3.78 <sup>4</sup>   |
| 81 | 33704-61-9 | Cashmeran                | 4.9 <sup>4</sup>  | 3.46 <sup>4</sup>   |

---

|     |            |                               |                   |                   |
|-----|------------|-------------------------------|-------------------|-------------------|
| 82  | 54464-57-2 | OTNE                          | 5.28 <sup>4</sup> | 3.63 <sup>4</sup> |
| 83  | 3380-34-5  | Triclosan                     | 4.76 <sup>4</sup> | 3.02 <sup>4</sup> |
| 84  | 4640-01-1  | Methyl triclosan              | 5.22 <sup>4</sup> | 3.62 <sup>4</sup> |
| 85  | 28159-98-0 | Irgarol                       | 4.07 <sup>4</sup> | 3.6 <sup>4</sup>  |
| 86  | 25154-52-3 | Nonylphenol                   | 5.9 <sup>4</sup>  | 3.49 <sup>4</sup> |
| 87  | 27193-28-8 | Octylphenol                   | 5.5 <sup>4</sup>  | 3.28 <sup>4</sup> |
| 88  | 83834-59-7 | 2-ethylhexyl methoxycinnamate | 5.77 <sup>4</sup> | 4.77 <sup>4</sup> |
| 89  | 36861-47-9 | 4-methylbenzylidene camphor   | 4.95 <sup>4</sup> | 3.39 <sup>4</sup> |
| 90  | 118-60-5   | 2-ethylhexyl salicylate       | 5.77 <sup>4</sup> | 4.70 <sup>4</sup> |
| 91  | 118-56-9   | Homosalate                    | 5.82 <sup>4</sup> | 4.55 <sup>4</sup> |
| 92  | 131-57-7   | Benzophenone-3                | 3.64 <sup>4</sup> | 3.08 <sup>4</sup> |
| 93  | 117-99-7   | 2-hydroxybenzophenone         | 3.47 <sup>4</sup> | 3.04 <sup>4</sup> |
| 94  | 6197-30-4  | Octocrylene                   | 7.53 <sup>4</sup> | 4.96 <sup>4</sup> |
| 95  | 126-71-6   | Tris-isobutylphosphate        | 3.71 <sup>4</sup> | 4.68 <sup>4</sup> |
| 96  | 126-73-8   | Tris-n-butylphosphate         | 4.26 <sup>4</sup> | 5.00 <sup>4</sup> |
| 97  | 1241-94-7  | 2-ethylhexyldiphenylphosphate | 5.73 <sup>4</sup> | 5.39 <sup>4</sup> |
| 98  | 115-86-6   | Triphenylphosphate            | 4.7 <sup>4</sup>  | 4.94 <sup>4</sup> |
| 99  | 78-42-2    | Tris-2-ethylhexylphosphate    | 9.49 <sup>4</sup> | 5.88 <sup>4</sup> |
| 100 | 78-30-8    | Tris-o-tolylphosphate         | 6.3 <sup>4</sup>  | 5.50 <sup>4</sup> |
| 101 | 563-04-2   | Tris-m-tolylphosphate         | 6.3 <sup>4</sup>  | 5.77 <sup>4</sup> |
| 102 | 1330-78-5  | Tris-p-tolylphosphate         | 6.3 <sup>4</sup>  | 5.85 <sup>4</sup> |
| 103 | 13029-08-8 | PCB 4                         | 4.65 <sup>2</sup> | 4.59 <sup>2</sup> |
| 104 | 33146-45-1 | PCB 10                        | 4.84 <sup>2</sup> | 4.55 <sup>2</sup> |
| 105 | 34883-41-5 | PCB 14                        | 5.28 <sup>2</sup> | 5.14 <sup>2</sup> |
| 106 | 55702-46-0 | PCB 21                        | 5.51 <sup>2</sup> | 5.43 <sup>2</sup> |
| 107 | 15862-07-4 | PCB 29                        | 5.6 <sup>2</sup>  | 5.43 <sup>2</sup> |
| 108 | 35693-92-6 | PCB 30                        | 5.44 <sup>2</sup> | 5.24 <sup>2</sup> |
| 109 | 2437-79-8  | PCB 47                        | 5.85 <sup>2</sup> | 5.78 <sup>2</sup> |

---

|     |            |         |                   |                   |
|-----|------------|---------|-------------------|-------------------|
| 110 | 62796-65-0 | PCB 50  | 5.63 <sup>2</sup> | 5.70 <sup>2</sup> |
| 111 | 74338-24-2 | PCB 55  | 6.11 <sup>2</sup> | 6.00 <sup>2</sup> |
| 112 | 41464-43-1 | PCB 56  | 6.11 <sup>2</sup> | 6.04 <sup>2</sup> |
| 113 | 70362-49-1 | PCB 78  | 6.35 <sup>2</sup> | 6.05 <sup>2</sup> |
| 114 | 65510-45-4 | PCB 85  | 6.3 <sup>2</sup>  | 6.24 <sup>2</sup> |
| 115 | 38380-02-8 | PCB 87  | 6.29 <sup>2</sup> | 6.35 <sup>2</sup> |
| 116 | 56558-16-8 | PCB 104 | 5.81 <sup>2</sup> | 6.17 <sup>2</sup> |
| 117 | 52712-04-6 | PCB 141 | 6.82 <sup>2</sup> | 6.70 <sup>2</sup> |
| 118 | 74472-40-5 | PCB 145 | 6.25 <sup>2</sup> | 6.65 <sup>2</sup> |
| 119 | 74472-52-9 | PCB 204 | 7.3 <sup>2</sup>  | 7.59 <sup>2</sup> |

<sup>a</sup> The log $K_{ow}$  value was calculated using EPIWEB 4.1 free on-line software (copyright: US Environmental Protection Agency)

## Reference

1. K. Yates, I. Davies, L. Webster, P. Pollard, L. Lawton and C. Moffat, Passive sampling: partition coefficients for a silicone rubber reference phase, *J. Environ. Monitor.*, 2007, **9**, 1116-1121.
2. F. Smedes, R. W. Geertsma, T. V. D. Zande and K. Booij, Polymer-water partition coefficients of hydrophobic compounds for passive sampling: application of cosolvent models for validation, *Environ. Sci. Technol.*, 2009, **43**, 7047-7054.
3. M. T. O. Jonker, S. A. van der Heijden, M. Kotte and F. Smedes, Quantifying the effects of temperature and salinity on partitioning of hydrophobic organic chemicals to silicone rubber passive samplers, *Environ. Sci. Technol.*, 2015, **49**, 6791-6799.
4. M. G. Pintado-Herrera, P. A. Lara-Martin, E. Gonzalez-Mazo and I. J. Allan, Determination of silicone rubber and low-density polyethylene diffusion and polymer/water partition coefficients for emerging contaminants, *Environ. Toxicol. Chem.*, 2016, **35**, 2162-2172.
